# Supplementary material for: Site-specific and kinetic characterization of enzymatic and nonenzymatic protein acetylation in bacteria
Source: PubMed Central journal article supplement (PMC5665961; doi:10.1038/s41598-017-13897-w), 2017-11-01
Supplement: 41598_2017_13897_MOESM1_ESM.pdf [file 41598_2017_13897_MOESM1_ESM.pdf]

# Site-specific and kinetic characterization of enzymatic and nonenzymatic protein acetylation in bacteria

Miao-Miao Wang<sup>1,2§</sup>, Di You<sup>2§</sup>, Bang-Ce Ye<sup>\*1,2</sup>

<sup>1</sup>Collaborative Innovation Center of Yangtze River Delta Region Green Pharmaceuticals, College of Pharmaceutical Sciences, Zhejiang University of Technology, Hangzhou 310014, Zhejiang, China

<sup>2</sup>Lab of Biosystems and Microanalysis, State Key Laboratory of Bioreactor Engineering, East China University of Science and Technology, Shanghai, 200237, China

<sup>§</sup>These authors contributed equally to this work.

## To whom correspondence should be addressed:

Bang-Ce Ye

Professor, College of Pharmaceutical Sciences

Zhejiang University of Technology, Hangzhou 310014, Zhejiang, China

Tel/Fax: 0086-21-64252094

Email: [yebangce@zjut.edu.cn](mailto:yebangce@zjut.edu.cn); [bcye@ecust.edu.cn](mailto:bcye@ecust.edu.cn)

## Supporting Information

**Table S1.** The pKa and buried ratio of lysine residues in *BsAcsA*

| Residue | pKa   | Buried | Residue | pKa   | Buried | Residue | pKa   | Buried |
|---------|-------|--------|---------|-------|--------|---------|-------|--------|
| Lys32   | 10.30 | 23%    | Lys164  | 10.85 | 31%    | Lys410  | 11.04 | 0%     |
| Lys41   | 10.45 | 0%     | Lys192  | 10.57 | 0%     | Lys425  | 10.26 | 0%     |
| Lys58   | 10.46 | 0%     | Lys205  | 9.40  | 38%    | Lys475  | 10.50 | 50%    |
| Lys60   | 11.14 | 13%    | Lys206  | 10.59 | 17%    | Lys490  | 10.23 | 4%     |
| Lys66   | 8.45  | 60%    | Lys222  | 9.19  | 24%    | Lys500  | 11.74 | 37%    |
| Lys69   | 10.47 | 0%     | Lys239  | 11.19 | 1%     | Lys514  | 10.58 | 0%     |
| Lys73   | 10.73 | 3%     | Lys245  | 10.53 | 0%     | Lys516  | 10.40 | 0%     |
| Lys77   | 10.59 | 0%     | Lys320  | 10.59 | 0%     | Lys524  | 9.86  | 5%     |
| Lys80   | 10.98 | 35%    | Lys346  | 10.35 | 0%     | Lys539  | 9.08  | 26%    |
| Lys98   | 11.12 | 18%    | Lys350  | 10.31 | 0%     | Lys541  | 10.46 | 0%     |
| Lys121  | 7.53  | 88%    | Lys375  | 11.56 | 0%     | Lys544  | 11.29 | 0%     |
| Lys139  | 10.49 | 0%     | Lys381  | 10.62 | 0%     | Lys549  | 10.33 | 0%     |
| Lys148  | 10.67 | 0%     | Lys409  | 11.45 | 0%     | Lys556  | 6.86  | 76%    |

**Table S2.** Primers for overproduction of proteins and mutations

| Primers        | Sequence (5'-3')                                                                               |
|----------------|------------------------------------------------------------------------------------------------|
| BSU29680       | ATGGGTCGCGGATCCGAATTCATGAACTTGAAAGCGTTACCAGC<br>CTCGAGTGC GGCCGCAAGCTTTTAATCCTCCATTGTTGACAGATC |
| BSU29690 (GST) | CGCGTGGATCCCCAGGAATTCGTGGAACATCATAAAACATACC<br>AGTCAGTCACGATGCGGCCGCTAATACATATAACGATGATAAAAA   |
| pET-28-T       | TAATACGACTCACTATAGGG<br>TGCTAGTTATTGCTCAGCGG                                                   |
| pGEX-4T-T      | GGCTGGCAAGCCACGTTTGGTG<br>CCGGGAGCTGCATGTGTGAGAGG                                              |
| K524Q          | AAGAGATCCGCCTATTTGTACAGCAGGGTCTTGC<br>GTACAAATAGGCGGATCTCTCTTTTCAGTTTATCAG                     |
| K524R          | AAGAGATCCGCCTATTTGTAAAGCAGGGTCTTGC<br>CTTACAAATAGGCGGATCTCTCTTTTCAGTTTATCAG                    |
| K524A          | AAGAGATCCGCCTATTTGTAGCGCAGGGTCTTGC<br>GCTACAAATAGGCGGATCTCTCTTTTCAGTTTATCAG                    |
| K549Q          | CTTCCGAAAACCAGAAGCGGACAGATCATGAGGCGCGTG<br>GTCCGCTTCTGGTTTTTCGGAAGCTTATCTTTAAATTCGATCTCAC      |
| K549R          | CTTCCGAAAACCAGAAGCGGAAAGGATCATGAGGCGCGTG<br>CTTCCGCTTCTGGTTTTTCGGAAGCTTATCTTTAAATTCGATCTCAC    |
| K549A          | CTTCCGAAAACCAGAAGCGGAGCGATCATGAGGCGCGTG<br>GCTCCGCTTCTGGTTTTTCGGAAGCTTATCTTTAAATTCGATCTCAC     |

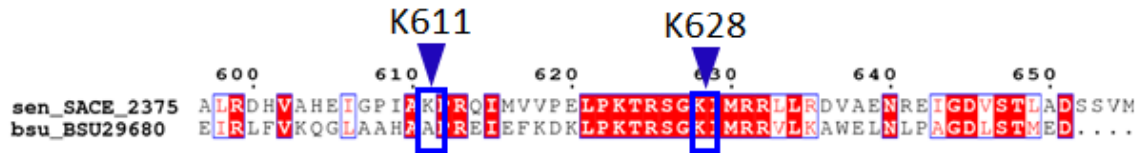

**Figure S1.** No lysine residue in *BsAcSA* (BSU29680) corresponding to K611 of *S. erythraea* *AcSA2* (SACE\_2375) was observed

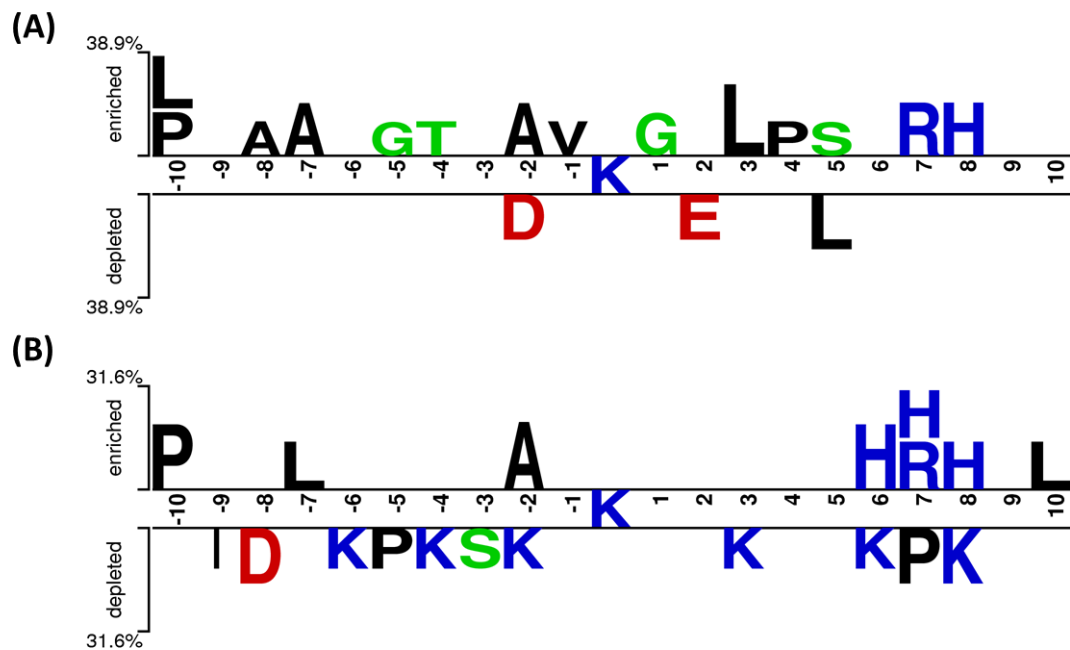

**Figure S2.** Analysis of the amino acid composition and position relative to acetyllysines. (A) A two sample logo was generated showing the amino acid composition in positions -10 to +10 relative to 14 lysines in Ac-CoA-dependent nonenzymatic acetylation. Only amino acid residues significantly enriched and depleted ( $0.05 < P < 0.1$ ; t-test) are shown. (B) A two sample logo was generated showing the amino acid composition in positions -10 to +10 relative to 19 lysines in AcP-dependent nonenzymatic acetylation. Only amino acid residues significantly enriched and depleted ( $0.05 < P < 0.1$ ; t-test) are shown.

Raw mass spectrometry data

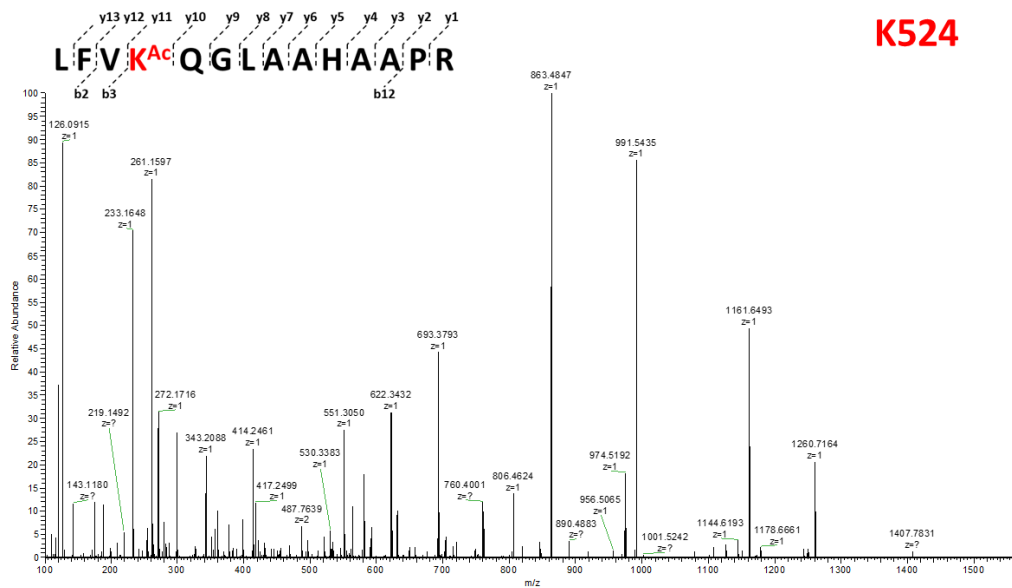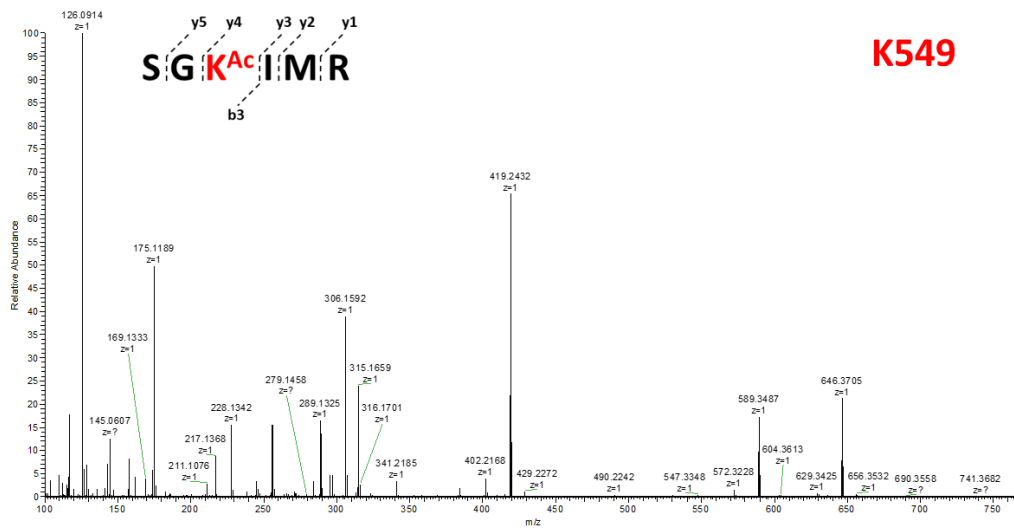

**Figure S3.** The MS/MS spectra of acetylpeptides containing K524 and K549 from the *BsAcSA*<sup>WT</sup> protein isolated from strain grew on acetate.

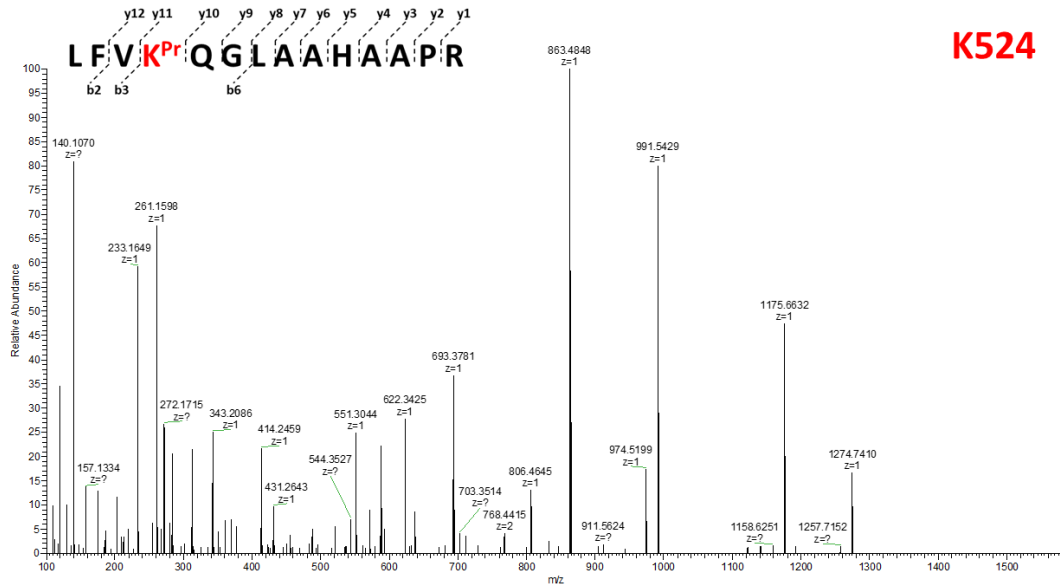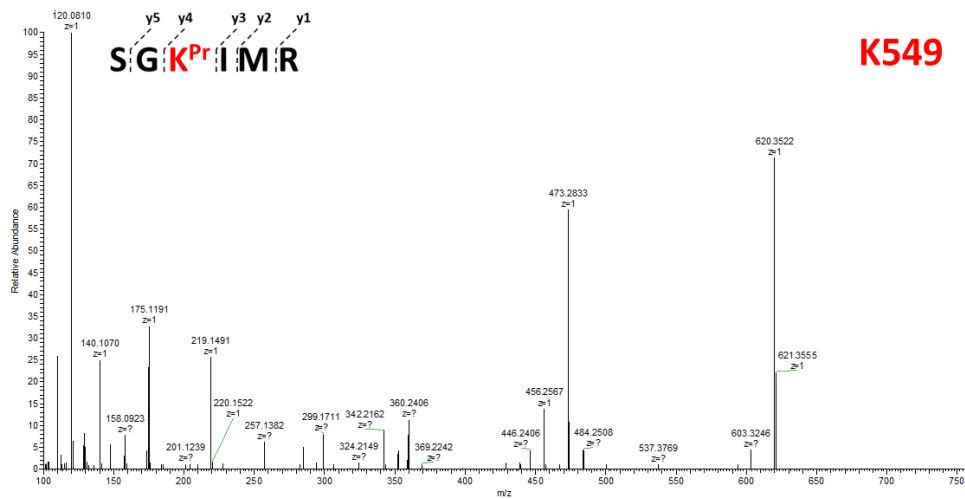

**Figure S4.** The MS/MS spectra of propionylpeptides containing K524 and K549 from the *BsAcsA*<sup>WT</sup> protein isolated from strain grew on propionate.

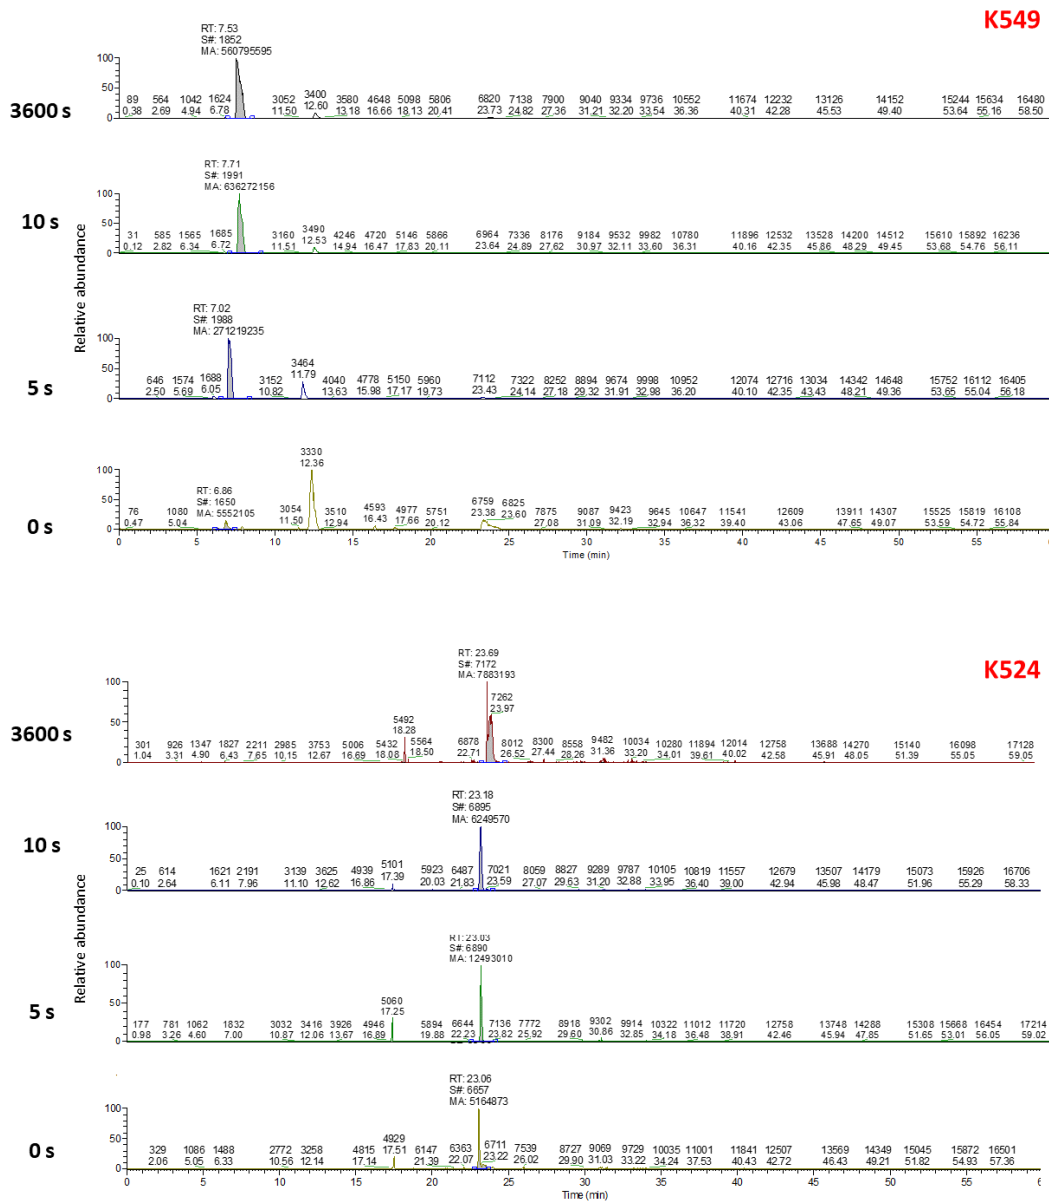

**Figure S5.** Mass spectrometry quantitative analysis of the AcuA-acetylated peptides containing K524 and K549. The effective AUC (areas under the curves) was in gray.

**K524**

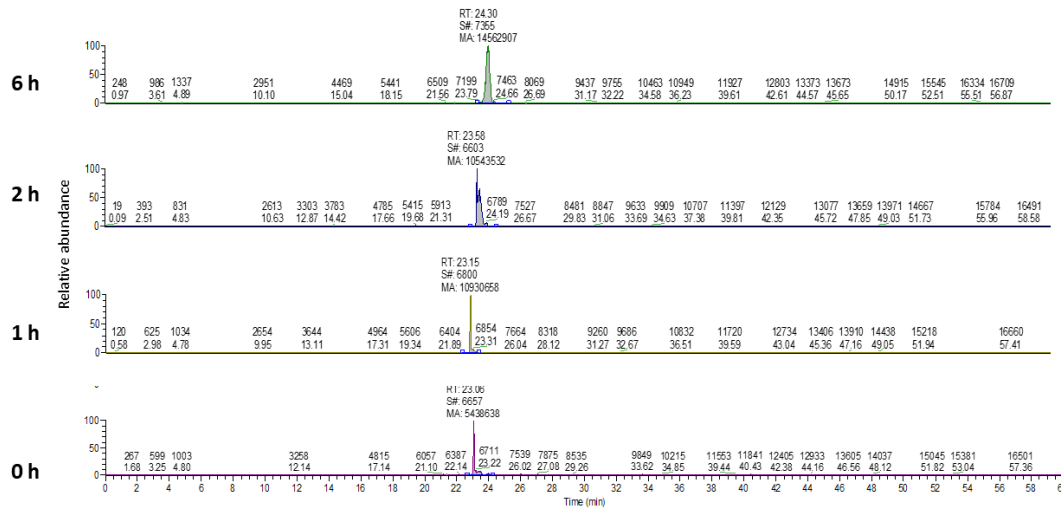

**K549**

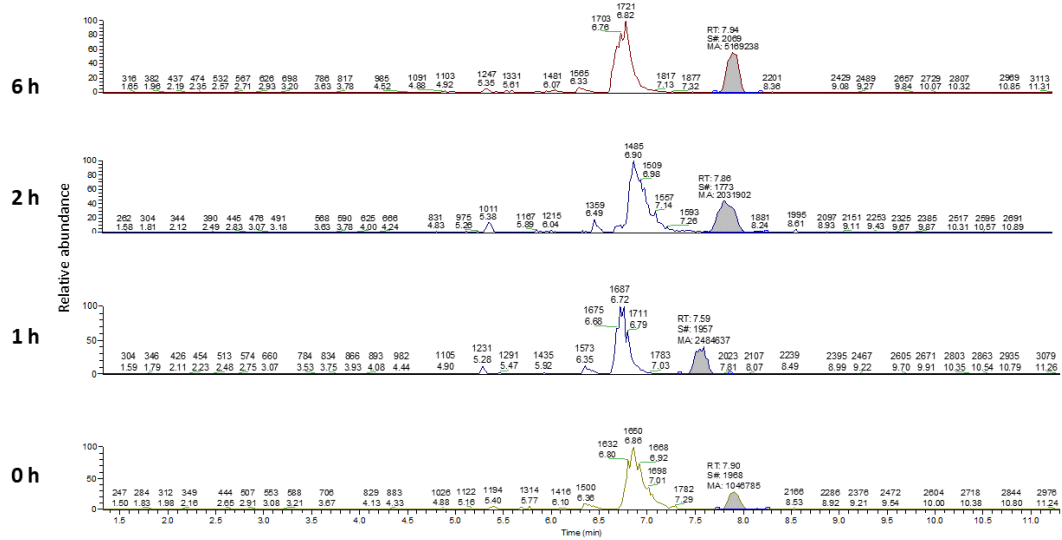

**Figure S6.** Mass spectrometry quantitative analysis of the Ac-CoA-acetylated peptides containing K524 and K549. The effective AUC (areas under the curves) was in gray.

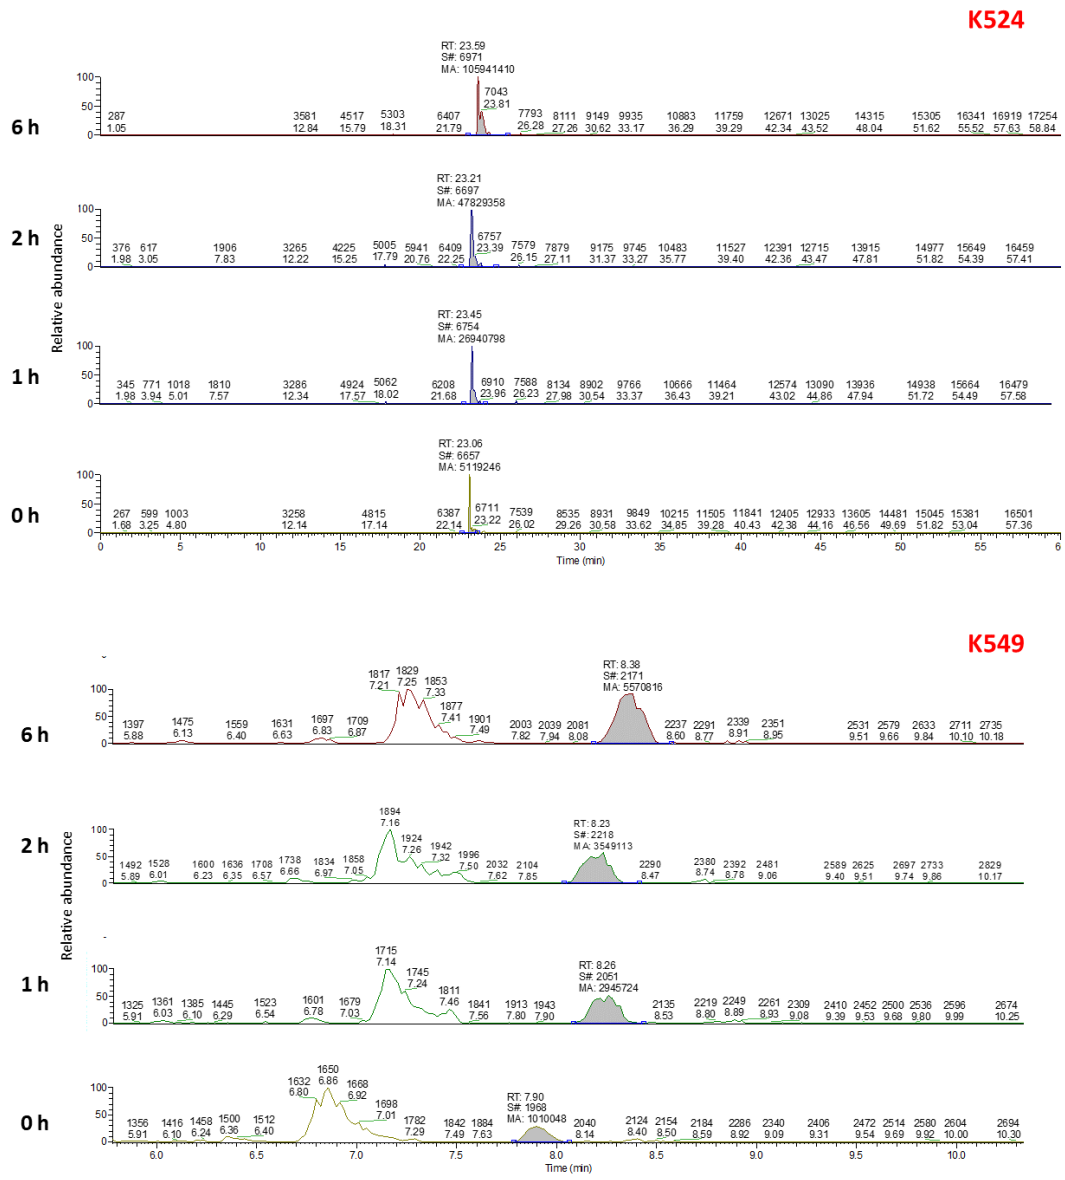

**Figure S7.** Mass spectrometry quantitative analysis of the AcP-acetylated peptides containing K524 and K549. The effective AUC (areas under the curves) was in gray.



K549

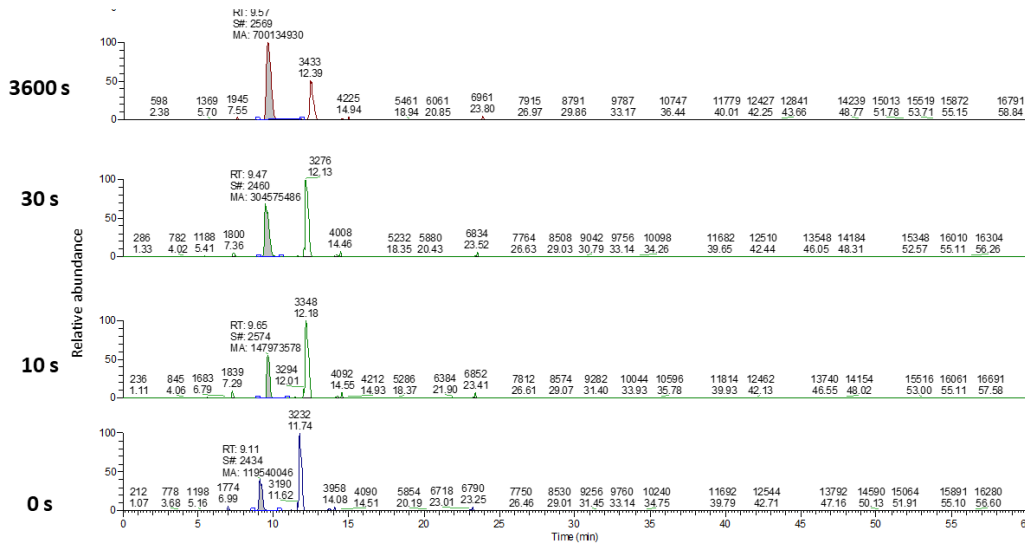

Figure S8. Mass spectrometry quantitative analysis of the AcuA-propionylated peptides containing K549. The effective AUC (areas under the curves) was in gray.

K524

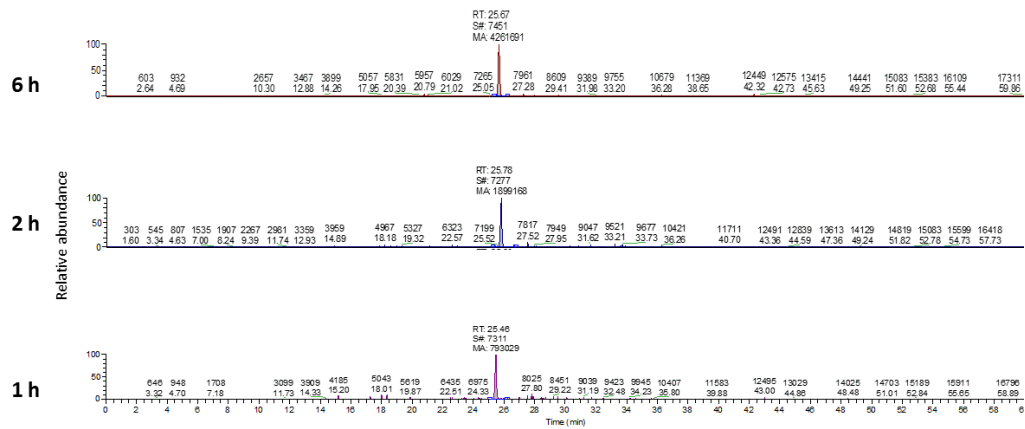

Figure S9. Mass spectrometry quantitative analysis of the Pr-CoA-propionylated peptides containing K524. The effective AUC (areas under the curves) was in gray.
